# Supplementary material
Source: publisher figshare collection journal article supplement (https://tandf.figshare.com/ndownloader/files/14617037)
Supplement: Supplementary file 1 [file 14617037]

Table S1. Primers used for qRT-PCR

| RD29B F | GCGGCGGGCAAAGC |
| --- | --- |
| RD29B R | AAGCAGTAACAGATCTCGGAGTTTC |
| MSL3 F | TTCCAGCGGTTGGGATTC |
| MSL3 R | TCTGGCAAGGCGCAGAAG |
| SnRK2.8 F | GCCATTGGAAGTAGCAGTATGGA |
| SnRK2.8 R | CGGTATCGATGTCGTCGAAA |
| DREB2A F | TGTTGATTCTCTATCCGAGTTTTAGTG |
| DREB2A R | GAACAACTTAAGAGAAGCAGACTAACAAA |
| COR15A F | AAACTCAGTTCGTCGTCGTTTCT |
| COR15A R | TCACCTTTAGCGGCGTAGATC |
